# Supplementary material for: Season dependent effects of urban environment on circadian clock of tree sparrow (Passer montanus)
Source: Royal Society of Chemistry journal article supplement (doi:10.1039/d0pp00257g), 2020-11-03
Supplement: d0pp00257g1.pdf [file d0pp00257g1.pdf]

| Tissue/Site  | Site  | Gene         | Months                        | Time                         | Interaction of monthsX time   |
|--------------|-------|--------------|-------------------------------|------------------------------|-------------------------------|
| Hypothalamus | Rural | <b>Bmal1</b> | $F_{2,72}= 13.85, P< 0.0001$  | $F_{5,72}= 22.48, P< 0.0001$ | $F_{10,72}= 11.19, P< 0.0001$ |
|              |       | <b>Clock</b> | $F_{2,72}= 38.96, P< 0.0001$  | $F_{5,72}= 4.920, P= 0.0006$ | $F_{10,72}= 6.873, P< 0.0001$ |
|              |       | <b>Npas2</b> | $F_{2,72}= 49.42, P< 0.0001$  | $F_{5,72}= 20.48, P< 0.0001$ | $F_{10,72}= 10.91, P< 0.0001$ |
|              |       | <b>Per2</b>  | $F_{2,72}= 6.290, P= 0.0030$  | $F_{5,72}= 18.00, P< 0.0001$ | $F_{10,72}= 2.277, P= 0.0222$ |
|              |       | <b>Cry1</b>  | $F_{2,72}= 76.63, P< 0.0001$  | $F_{5,72}= 68.79, P< 0.0001$ | $F_{10,72}= 25.70, P< 0.0001$ |
|              | Urban | <b>Bmal1</b> | $F_{2,72}= 20.94, P< 0.0001$  | $F_{5,72}= 21.74, P< 0.0001$ | $F_{10,72}= 14.16, P< 0.0001$ |
|              |       | <b>Clock</b> | $F_{2,72}= 7.787, P= 0.0009$  | $F_{5,72}= 33.51, P< 0.0001$ | $F_{10,72}= 22.55, P< 0.0001$ |
|              |       | <b>Npas2</b> | $F_{2,72}= 26.00, P< 0.0001$  | $F_{5,72}= 16.88, P< 0.0001$ | $F_{10,72}= 11.15, P< 0.0001$ |
|              |       | <b>Per2</b>  | $F_{2,72}= 5.229, P= 0.0281$  | $F_{5,72}= 16.79, P< 0.0001$ | $F_{10,72}= 4.174, P= 0.0001$ |
|              |       | <b>Cry1</b>  | $F_{2,72}= 17.70, P< 0.0001$  | $F_{5,72}= 10.29, P< 0.0001$ | $F_{10,72}= 7.989, P< 0.0001$ |
| Pineal       | Rural | <b>Bmal1</b> | $F_{2,72}= 5.294, P= 0.0280$  | $F_{5,72}= 27.48, P< 0.0001$ | $F_{10,72}= 8.169, P< 0.0001$ |
|              |       | <b>Clock</b> | $F_{2,72}= 16.37, P< 0.0001$  | $F_{5,72}= 6.789, P< 0.0001$ | $F_{10,72}= 6.046, P< 0.0001$ |
|              |       | <b>Npas2</b> | $F_{2,72}= 6.214, P= 0.0130$  | $F_{5,72}= 7.217, P< 0.0001$ | $F_{10,72}= 13.00, P< 0.0001$ |
|              |       | <b>Per2</b>  | $F_{2,72}= 30.54, P< 0.0001$  | $F_{5,72}= 22.09, P< 0.0001$ | $F_{10,72}= 26.74, P< 0.0001$ |
|              |       | <b>Cry1</b>  | $F_{2,72}= 3.255, P=- 0.0443$ | $F_{5,72}= 9.370, P< 0.0001$ | $F_{10,72}= 10.56, P< 0.0001$ |
|              | Urban | <b>Bmal1</b> | $F_{2,72}= 6.1594, P=0.0285$  | $F_{5,72}= 32.65, P< 0.0001$ | $F_{10,72}= 26.31, P< 0.0001$ |
|              |       | <b>Clock</b> | $F_{2,72}= 7.554, P= 0.0011$  | $F_{5,72}= 17.79, P< 0.0001$ | $F_{10,72}= 7.903, P< 0.0001$ |
|              |       | <b>Npas2</b> | $F_{2,72}= 6.7318, P=0.0261$  | $F_{5,72}= 26.68, P< 0.0001$ | $F_{10,72}= 10.34, P< 0.0001$ |
|              |       | <b>Per2</b>  | $F_{2,72}= 19.72, P< 0.0001$  | $F_{5,72}= 22.32, P< 0.0001$ | $F_{10,72}= 19.89, P< 0.0001$ |
|              |       | <b>Cry1</b>  | $F_{2,72}= 28.72, P< 0.0001$  | $F_{5,72}= 82.68, P< 0.0001$ | $F_{10,72}= 14.22, P< 0.0001$ |
| Retina       | Rural | <b>Bmal1</b> | $F_{2,72}= 49.75, P< 0.0001$  | $F_{5,72}= 46.52, P< 0.0001$ | $F_{10,72}= 38.22, P< 0.0001$ |
|              |       | <b>Clock</b> | $F_{2,72}= 17.54, P< 0.0001$  | $F_{5,72}= 18.80, P< 0.0001$ | $F_{10,72}= 13.12, P< 0.0001$ |
|              |       | <b>Npas2</b> | $F_{2,72}= 3.567, P= 0.0333$  | $F_{5,72}= 24.39, P< 0.0001$ | $F_{10,72}= 5.580, P< 0.0001$ |
|              |       | <b>Per2</b>  | $F_{2,72}= 5.854, P= 0.0164$  | $F_{5,72}= 6.103, P< 0.0001$ | $F_{10,72}= 11.77, P< 0.0001$ |
|              |       | <b>Cry1</b>  | $F_{2,72}= 59.79, P< 0.0001$  | $F_{5,72}= 151.9, P< 0.0001$ | $F_{10,72}= 25.40, P< 0.0001$ |
|              | Urban | <b>Bmal1</b> | $F_{2,72}= 12.14, P< 0.0001$  | $F_{5,72}= 33.90, P< 0.0001$ | $F_{10,72}= 17.90, P< 0.0001$ |
|              |       | <b>Clock</b> | $F_{2,72}= 11.08, P< 0.0001$  | $F_{5,72}= 14.78, P< 0.0001$ | $F_{10,72}= 11.75, P< 0.0001$ |

|  |                     |                                |                                |                                 |
|--|---------------------|--------------------------------|--------------------------------|---------------------------------|
|  | <b><i>Npas2</i></b> | $F_{2,72} = 19.27, P < 0.0001$ | $F_{5,72} = 11.00, P < 0.0001$ | $F_{10,72} = 5.263, P < 0.0001$ |
|  | <b><i>Per2</i></b>  | $F_{2,72} = 7.525, P = 0.0011$ | $F_{5,72} = 10.07, P < 0.0001$ | $F_{10,72} = 4.922, P < 0.0001$ |
|  | <b><i>Cry1</i></b>  | $F_{2,72} = 103.5, P < 0.0001$ | $F_{5,72} = 85.71, P < 0.0001$ | $F_{10,72} = 78.28, P < 0.0001$ |

Supplementary Table 1: Values of two way ANOVA.
