# Supplementary material for: Season dependent effects of urban environment on circadian clock of tree sparrow (Passer montanus)
Source: Royal Society of Chemistry journal article supplement (doi:10.1039/d0pp00257g), 2020-11-03
Supplement: d0pp00257g2.pdf [file d0pp00257g2.pdf]

| Tissue       | Month     | Gene         | Habitat                         | Time                           | Interaction of habitat x time  |
|--------------|-----------|--------------|---------------------------------|--------------------------------|--------------------------------|
| Hypothalamus | June      | <b>Bmal1</b> | $F_{1,48} = 36.47, P < 0.0001$  | $F_{5,48} = 22.73, P < 0.0001$ | $F_{5,48} = 8.000, P < 0.0001$ |
|              |           | <b>Clock</b> | $F_{1,48} = 04035, P = 0.0185$  | $F_{5,48} = 11.61, P < 0.0001$ | $F_{5,48} = 19.83, P < 0.0001$ |
|              |           | <b>Npas2</b> | $F_{1,48} = 12.43, P < 0.0001$  | $F_{5,48} = 12.04, P < 0.0001$ | $F_{5,48} = 15.05, P < 0.0001$ |
|              |           | <b>Per2</b>  | $F_{1,48} = 2.860, P = 0.0973$  | $F_{5,48} = 8.207, P < 0.0001$ | $F_{5,48} = 4.110, P = 0.0035$ |
|              |           | <b>Cry1</b>  | $F_{1,48} = 12.95, P < 0.0001$  | $F_{5,48} = 12.30, P < 0.0001$ | $F_{5,48} = 3.666, P = 0.0069$ |
|              | September | <b>Bmal1</b> | $F_{1,48} = 4.088, P = 0.0176$  | $F_{5,48} = 23.11, P < 0.0001$ | $F_{5,48} = 5.530, P = 0.0004$ |
|              |           | <b>Clock</b> | $F_{1,48} = 41.47, P < 0.0001$  | $F_{5,48} = 4.858, P = 0.0011$ | $F_{5,48} = 3.786, P = 0.0057$ |
|              |           | <b>Npas2</b> | $F_{1,48} = 87.45, P < 0.0001$  | $F_{5,48} = 17.02, P < 0.0001$ | $F_{5,48} = 13.17, P < 0.0001$ |
|              |           | <b>Per2</b>  | $F_{1,48} = 9.864, P = 0.0029$  | $F_{5,48} = 12.83, P < 0.0001$ | $F_{5,48} = 2.981, P = 0.0201$ |
|              |           | <b>Cry1</b>  | $F_{1,48} = 154.1, P < 0.0001$  | $F_{5,48} = 66.53, P < 0.0001$ | $F_{5,48} = 53.19, P < 0.0001$ |
|              | December  | <b>Bmal1</b> | $F_{1,48} = 5.487, P = 0.0121$  | $F_{5,48} = 27.87, P < 0.0001$ | $F_{5,48} = 4.441, P = 0.0021$ |
|              |           | <b>Clock</b> | $F_{1,48} = 78.76, P < 0.0001$  | $F_{5,48} = 121.6, P < 0.0001$ | $F_{5,48} = 53.90, P < 0.0001$ |
|              |           | <b>Npas2</b> | $F_{1,48} = 5.696, P = 0.0210$  | $F_{5,48} = 10.07, P < 0.0001$ | $F_{5,48} = 14.85, P < 0.0001$ |
|              |           | <b>Per2</b>  | $F_{1,48} = 9.229, P = 0.0038$  | $F_{5,48} = 33.04, P < 0.0001$ | $F_{5,48} = 16.15, P < 0.0001$ |
|              |           | <b>Cry1</b>  | $F_{1,48} = 19.09, P < 0.0001$  | $F_{5,48} = 113.0, P < 0.0001$ | $F_{5,48} = 18.12, P < 0.0001$ |
| Pineal       | June      | <b>Bmal1</b> | $F_{1,48} = 3.901, P = 0.0251$  | $F_{5,48} = 31.18, P < 0.0001$ | $F_{5,48} = 21.53, P < 0.0001$ |
|              |           | <b>Clock</b> | $F_{1,48} = 1.716, P = 0.0196$  | $F_{5,48} = 12.42, P < 0.0001$ | $F_{5,48} = 8.078, P < 0.0001$ |
|              |           | <b>Npas2</b> | $F_{1,48} = 0.0492, P = 0.8253$ | $F_{5,48} = 2.716, P = 0.0306$ | $F_{5,48} = 5.323, P = 0.0006$ |
|              |           | <b>Per2</b>  | $F_{1,48} = 109.7, P < 0.0001$  | $F_{5,48} = 56.61, P < 0.0001$ | $F_{5,48} = 40.71, P < 0.0001$ |
|              |           | <b>Cry1</b>  | $F_{1,48} = 4.2792, P = 0.0159$ | $F_{5,48} = 33.62, P < 0.0001$ | $F_{5,48} = 37.60, P < 0.0001$ |
|              | September | <b>Bmal1</b> | $F_{1,48} = 5.2599, P = 0.0012$ | $F_{5,48} = 2.716, P = 0.0306$ | $F_{5,48} = 5.323, P = 0.0006$ |
|              |           | <b>Clock</b> | $F_{1,48} = 13.28, P = 0.0007$  | $F_{5,48} = 8.315, P < 0.0001$ | $F_{5,48} = 4.388, P = 0.0023$ |
|              |           | <b>Npas2</b> | $F_{1,48} = 3.9267, P = 0.0340$ | $F_{5,48} = 11.37, P < 0.0001$ | $F_{5,48} = 6.507, P = 0.0001$ |
|              |           | <b>Per2</b>  | $F_{1,48} = 3.181, P = 0.0282$  | $F_{5,48} = 12.53, P < 0.0001$ | $F_{5,48} = 53.69, P < 0.0001$ |
|              |           | <b>Cry1</b>  | $F_{1,48} = 11.68, P = 0.0013$  | $F_{5,48} = 10.69, P < 0.0001$ | $F_{5,48} = 12.62, P < 0.0001$ |
|              | December  | <b>Bmal1</b> | $F_{1,48} = 15.19, P = 0.0003$  | $F_{5,48} = 46.70, P < 0.0001$ | $F_{5,48} = 87.86, P < 0.0001$ |
|              |           | <b>Clock</b> | $F_{1,48} = 39.83, P < 0.0001$  | $F_{5,48} = 14.32, P < 0.0001$ | $F_{5,48} = 11.94, P < 0.0001$ |

|               |              |              |                               |                               |                               |
|---------------|--------------|--------------|-------------------------------|-------------------------------|-------------------------------|
|               |              | <i>Npas2</i> | $F_{1,48} = 4.337, P=0.0132$  | $F_{5,48} = 26.01, P< 0.0001$ | $F_{5,48} = 34.20, P< 0.0001$ |
|               |              | <i>Per2</i>  | $F_{1,48} = 25.14, P< 0.0001$ | $F_{5,48} = 86.95, P< 0.0001$ | $F_{5,48} = 53.69, P< 0.0001$ |
|               |              | <i>Cry1</i>  | $F_{1,48} = 25.56, P< 0.0001$ | $F_{5,48} = 76.84, P< 0.0001$ | $F_{5,48} = 15.43, P< 0.0001$ |
| <b>Retina</b> | June         | <i>Bmal1</i> | $F_{1,48} = 107.0, P< 0.0001$ | $F_{5,48} = 49.72, P< 0.0001$ | $F_{5,48} = 36.97, P< 0.0001$ |
|               |              | <i>Clock</i> | $F_{1,48} = 70.00, P< 0.0001$ | $F_{5,48} = 30.29, P< 0.0001$ | $F_{5,48} = 28.76, P< 0.0001$ |
|               |              | <i>Npas2</i> | $F_{1,48} = 87.14, P< 0.0001$ | $F_{5,48} = 16.11, P< 0.0001$ | $F_{5,48} = 11.44, P< 0.0001$ |
|               |              | <i>Per2</i>  | $F_{1,48} = 65.66, P< 0.0001$ | $F_{5,48} = 36.24, P< 0.0001$ | $F_{5,48} = 11.08, P< 0.0001$ |
|               |              | <i>Cry1</i>  | $F_{1,48} = 34.98, P< 0.0001$ | $F_{5,48} = 86.95, P< 0.0001$ | $F_{5,48} = 53.69, P< 0.0001$ |
|               |              | September    | <i>Bmal1</i>                  | $F_{1,48} = 38.81, P< 0.0001$ | $F_{5,48} = 29.98, P< 0.0001$ |
|               | <i>Clock</i> |              | $F_{1,48} = 9.722, P=0.0139$  | $F_{5,48} = 14.50, P< 0.0001$ | $F_{5,48} = 10.44, P< 0.0001$ |
|               | <i>Npas2</i> |              | $F_{1,48} = 13.91, P< 0.0001$ | $F_{5,48} = 4.934, P= 0.0010$ | $F_{5,48} = 10.95, P< 0.0001$ |
|               | <i>Per2</i>  |              | $F_{1,48} = 3.398, P=0.0351$  | $F_{5,48} = 7.473, P< 0.0001$ | $F_{5,48} = 4.273, P= 0.0027$ |
|               | <i>Cry1</i>  |              | $F_{1,48} = 21.58, P< 0.0001$ | $F_{5,48} = 10.78, P< 0.0001$ | $F_{5,48} = 3.841, P< 0.0001$ |
|               | December     |              | <i>Bmal1</i>                  | $F_{1,48} = 11.43, P= 0.0014$ | $F_{5,48} = 18.43, P< 0.0001$ |
|               |              | <i>Clock</i> | $F_{1,48} = 4.239, P= 0.0182$ | $F_{5,48} = 20.75, P< 0.0001$ | $F_{5,48} = 8.341, P< 0.0001$ |
|               |              | <i>Npas2</i> | $F_{1,48} = 1.900, P=0.1745$  | $F_{5,48} = 17.34, P< 0.0001$ | $F_{5,48} = 1.299, P=0.2801$  |
|               |              | <i>Per2</i>  | $F_{1,48} = 3.420, P=0.0319$  | $F_{5,48} = 7.014, P< 0.0001$ | $F_{5,48} = 3.334, P= 0.0115$ |
|               |              | <i>Cry1</i>  | $F_{1,48} = 6.369, P=0.0247$  | $F_{5,48} = 94.44, P< 0.0001$ | $F_{5,48} = 71.53, P< 0.0001$ |

Suppl. Table 2: Values of two way ANOVA
