# Supplementary material for: Season dependent effects of urban environment on circadian clock of tree sparrow (Passer montanus)
Source: Royal Society of Chemistry journal article supplement (doi:10.1039/d0pp00257g), 2020-11-03
Supplement: d0pp00257g3.pdf [file d0pp00257g3.pdf]

| Tissue       | Gene         | Site  | June  |           |           | September |           |           | December |           |           |
|--------------|--------------|-------|-------|-----------|-----------|-----------|-----------|-----------|----------|-----------|-----------|
|              |              |       | Mesor | Amplitude | Acrophase | Mesor     | Amplitude | Acrophase | Mesor    | Amplitude | Acrophase |
| Hypothalamus | <i>Bmal1</i> | Rural | 1.7   | 2.4       | 6.8       | 0.4       | 0.6       | 10.4      | 1.3      | 2.1       | 8.1       |
|              |              | Urban | 0.4   | 0.7       | 6.8       | 0.4       | 0.6       | 7.3       | 2.3      | 3.9       | 5.9       |
|              | <i>Clock</i> | Rural | 0.6   | 1.1       | 12.8      | 2.4       | 1.7       | 5.4       | 0.2      | 0.4       | 8.3       |
|              |              | Urban | 0.6   | 1.0       | 5.2       | 0.4       | 0.4       | 8.7       | 1.0      | 1.6       | 9.0       |
|              | <i>Npas2</i> | Rural | 0.5   | 0.6       | 14.4      | 2.8       | 3.1       | 5.0       | 0.7      | 1.3       | 12.5      |
|              |              | Urban | 0.2   | 0.3       | 9.2       | 0.3       | 0.2       | 5.7       | 1.4      | 2.1       | 10.0      |
|              | <i>Per2</i>  | Rural | 1.4   | 1.6       | 23.1      | 2.6       | 2.5       | 0.5       | 0.8      | 0.5       | 0.1       |
|              |              | Urban | 0.9   | 1.3       | 22.0      | 0.9       | 0.4       | 23.5      | 0.6      | 1.0       | 20.6      |
|              | <i>Cry1</i>  | Rural | 0.3   | 0.4       | 13.6      | 0.7       | 0.9       | 10.7      | 0.1      | 0.2       | 10.2      |
|              |              | Urban | 0.8   | 1.0       | 12.4      | 0.2       | 0.1       | 10.0      | 0.2      | 0.4       | 9.5       |
| Pineal       | <i>Bmal1</i> | Rural | 1.1   | 1.6       | 15.8      | 1.1       | 1.1       | 12.6      | 1.4      | 2.2       | 12.7      |
|              |              | Urban | 0.8   | 1.4       | 13.2      | 0.9       | 0.8       | 5.7       | 0.9      | 1.6       | 5.1       |
|              | <i>Clock</i> | Rural | 1.1   | 0.9       | 11.3      | 1.7       | 1.7       | 7.5       | 0.4      | 0.2       | 10.7      |
|              |              | Urban | 2.2   | 4.0       | 12.9      | 0.6       | 0.7       | 9.2       | 3.0      | 4.1       | 14.5      |
|              | <i>Npas2</i> | Rural | 0.7   | 1.2       | 17.4      | 0.8       | 0.7       | 12.7      | 0.6      | 0.7       | 10.5      |

|        |              |       |     |     |      |     |     |      |     |     |      |
|--------|--------------|-------|-----|-----|------|-----|-----|------|-----|-----|------|
|        |              | Urban | 1.9 | 2.5 | 17   | 0.7 | 0.7 | 8.1  | 0.7 | 1.0 | 10.2 |
|        | <i>Per2</i>  | Rural | 2.2 | 3.0 | 0.2  | 1.7 | 1.3 | 3.2  | 0.6 | 0.5 | 0.2  |
|        |              | Urban | 0.6 | 0.4 | 23.9 | 1.5 | 1.7 | 22.9 | 0.5 | 0.6 | 22.6 |
|        | <i>Cry1</i>  | Rural | 0.4 | 0.5 | 12.8 | 0.6 | 0.8 | 13.9 | 0.7 | 1.1 | 7.6  |
|        |              | Urban | 0.3 | 0.5 | 8.4  | 1.4 | 1.5 | 9.7  | 1.7 | 2.8 | 8.0  |
| Retina | <i>Bmal1</i> | Rural | 4.5 | 6.3 | 9.0  | 1.6 | 1.2 | 14.1 | 1.0 | 1.3 | 11.2 |
|        |              | Urban | 0.4 | 0.7 | 6.8  | 0.8 | 0.8 | 12.1 | 0.4 | .05 | 9.6  |
|        | <i>Clock</i> | Rural | 1.0 | 1.0 | 10.6 | 1.8 | 1.3 | 7.0  | 2.4 | 1.7 | 9.8  |
|        |              | Urban | 0.4 | 0.3 | 15.1 | 2.1 | 3.3 | 8.7  | 1.8 | 1.8 | 10.2 |
|        | <i>Npas2</i> | Rural | 2.0 | 2.1 | 10.1 | 1.9 | 1.7 | 14.6 | 1.8 | 1.9 | 11.5 |
|        |              | Urban | 0.3 | 0.3 | 6.6  | 0.9 | 1.1 | 7.6  | 1.4 | 1.4 | 11.4 |
|        | <i>Per2</i>  | Rural | 2.6 | 2.6 | 4.1  | 2.4 | 1.5 | 23.8 | 1.1 | 1.0 | 22.7 |
|        |              | Urban | 0.7 | 0.9 | 1.3  | 1.1 | 0.9 | 22.4 | 2.2 | 1.2 | 20.3 |
|        | <i>Cry1</i>  | Rural | 2.6 | 4.0 | 8.5  | 2.2 | 1.8 | 10.3 | 4.8 | 5.4 | 9.8  |
|        |              | Urban | 1.0 | 0.7 | 8.9  | 1.0 | .97 | 7.8  | 1.3 | 1.7 | 10.4 |

Supplementary Table 3: Rhythm parameters of all nine genes in different tissues under different habitat of tree sparrow, as determined by cosinor analyses.
