# Supplementary material for: Season dependent effects of urban environment on circadian clock of tree sparrow (Passer montanus)
Source: Royal Society of Chemistry journal article supplement (doi:10.1039/d0pp00257g), 2020-11-03
Supplement: d0pp00257g4.pdf [file d0pp00257g4.pdf]

**Supplementary Table 4a:** Relationship in time of peak expression of clock genes within the tissue in reference to *Per2* acrophase

| Gene  | Hypo |       |       | Pineal |       |       | Retina |       |       |
|-------|------|-------|-------|--------|-------|-------|--------|-------|-------|
|       | June | Sep   | Dec   | June   | Sep   | Dec   | June   | Sep   | Dec   |
| Bmal1 | -7.7 | -9.9  | -8.0  | -8.4   | -9.4  | 11.5  | -8.9   | 9.7   | 11.5  |
| Clock | 10.3 | -4.9  | -8.2  | -11.1  | -4.3  | -10.5 | -6.5   | -7.2  | -11.1 |
| Npas2 | 8.7  | -4.5  | 11.6  | 6.8    | -9.5  | -10.3 | -6.0   | 9.2   | 11.2  |
| Cry1  | 9.5  | -10.2 | -10.1 | 11.4   | -10.1 | -7.4  | -4.4   | -10.5 | -11.1 |

**Supplementary Table 4b:** Relationship in time of peak expression of clock genes between tissues in reference to hypothalamus

| Gene  | Pineal |      |      | Retina |      |      |
|-------|--------|------|------|--------|------|------|
|       | June   | Sep  | Dec  | June   | Sep  | Dec  |
| Bmal1 | -9     | -2.2 | -4.6 | -2.2   | -3.7 | -3.1 |
| Clock | 1.5    | -2.1 | -2.4 | 2.2    | -1.6 | -1.5 |
| Npas2 | -3     | -7.7 | 2    | 4.3    | -9.6 | 1.0  |
| Per2  | -1.1   | -2.7 | -0.1 | -5.0   | 0.7  | 1.4  |
| Cry1  | 0.8    | -3.2 | 2.6  | 5.1    | 0.4  | 0.4  |

**Supplementary Table 4c:** Acrophase of clock genes in urban birds in three central tissues at three time of the year with reference to rural birds

| Gene  | Hypo |      |      | Pineal |      |      | Retina |      |      |
|-------|------|------|------|--------|------|------|--------|------|------|
|       | June | Sep  | Dec  | June   | Sep  | Dec  | June   | Sep  | Dec  |
| Bmal1 | 0    | 3.1  | 2.2  | 2.6    | 4.6  | 0.3  | 2.2    | 2.0  | 1.6  |
| Clock | -2.4 | -3.3 | -0.7 | -1.6   | -1.7 | -4.8 | -4.5   | -1.7 | -0.8 |
| Npas2 | 5.2  | -0.7 | 2.5  | 0.4    | 4.6  | 0.3  | 3.5    | 7    | 0.1  |
| Per2  | 1.1  | 1.0  | 3.5  | 0.3    | 4.3  | 1.6  | 2.8    | 1.4  | 2.4  |
| Cry1  | 1.2  | 0.7  | 0.7  | 4.4    | 4.2  | -0.4 | -0.4   | 2.5  | -0.6 |

**Supplementary Table 4d:** Acrophase of clock genes during June and December in rural birds with reference to September month

| Gene  | Hypo |      |     | Pineal |      |     | Retina |     |      |
|-------|------|------|-----|--------|------|-----|--------|-----|------|
|       | June | Dec  | Sep | June   | Dec  | Sep | June   | Sep | Dec  |
| Bmal1 | 3.6  | 2.3  |     | -3.2   | -0.1 |     | 5.1    |     | 2.9  |
| Clock | -7.4 | -2.3 |     | -3.7   | -3.2 |     | -3.6   |     | -2.8 |
| Npas2 | -9.4 | -7.5 |     | -4.7   | 2.2  |     | 4.5    |     | 3.1  |
| Per2  | -1.4 | -0.4 |     | 3      | 3    |     | -4.3   |     | 1.1  |
| Cry1  | -2.9 | 0.5  |     | 1.1    | 6.3  |     | 1.8    |     | 0.5  |
